# Supplementary material
Source: PubMed Central journal article supplement (PMC4722945)
Supplement: supp_dc15-1498v151498_DC151498SupplementaryData.pdf [file supp_dc15-1498v151498_DC151498SupplementaryData.pdf]

SUPPLEMENTARY DATA

|                                                                                                      |          |
|------------------------------------------------------------------------------------------------------|----------|
| <b>Supplementary Table 1. Baseline Demographic and Clinical Characteristics.....</b>                 | <b>2</b> |
| <b>Supplementary Table 2. Additional Insulin Infusion Characteristics by Treatment Arm. 4</b>        | <b>4</b> |
| <b>Supplementary Figure 1. Visit Completion .....</b>                                                | <b>5</b> |
| <b>Supplementary Figure 2. Edinburgh Hypoglycemia Symptom Scores According to Treatment Arm.....</b> | <b>6</b> |
| <b>List of Investigators .....</b>                                                                   | <b>7</b> |

SUPPLEMENTARY DATA

**Supplementary Table S1. Baseline Demographic and Clinical Characteristics**

|                                                                                          | Overall N=77      |
|------------------------------------------------------------------------------------------|-------------------|
| Age (years) – n(%)                                                                       |                   |
| 18 to <25                                                                                | 28 (36)           |
| 25 to <35                                                                                | 23 (30)           |
| 35 to <45                                                                                | 10 (13)           |
| 45 to <55                                                                                | 11 (14)           |
| ≥55                                                                                      | 5 (6)             |
| Median (25 <sup>th</sup> , 75 <sup>th</sup> percentile)                                  | 31 (22, 42)       |
| Mean ±SD                                                                                 | 33 ± 12           |
| Female – n(%)                                                                            | 45 (58)           |
| Race/ethnicity – n(%)                                                                    |                   |
| White Non-Hispanic                                                                       | 74 (96)           |
| Black Non-Hispanic                                                                       | 1 (1)             |
| Hispanic or Latino                                                                       | 1 (1)             |
| Other Race/Ethnicity                                                                     | 1 (1)             |
| Duration of diabetes (years) – n(%)                                                      |                   |
| <10                                                                                      | 27 (35)           |
| 10 to <20                                                                                | 16 (21)           |
| 20 to <30                                                                                | 20 (26)           |
| ≥30                                                                                      | 14 (18)           |
| Median (25 <sup>th</sup> , 75 <sup>th</sup> percentile)                                  | 18 (9, 25)        |
| Mean ±SD                                                                                 | 18 ± 11           |
| Body mass index (kg/m <sup>2</sup> ) – n(%)                                              |                   |
| 18.5 - <25.0                                                                             | 35 (45%)          |
| 25.0-<30.0                                                                               | 30 (39%)          |
| ≥30.0                                                                                    | 12 (16%)          |
| Median (25 <sup>th</sup> , 75 <sup>th</sup> percentile)                                  | 25 (23,28)        |
| Mean ±SD                                                                                 | 26 ± 4            |
| Primary insulin modality – n(%)                                                          |                   |
| Insulin pump                                                                             | 57 (74)           |
| Multiple daily insulin injections                                                        | 20 (26)           |
| Total daily insulin (units/kg) - median (25 <sup>th</sup> , 75 <sup>th</sup> percentile) | 0.58 (0.46, 0.68) |
| Most recent severe hypoglycemic event <sup>a</sup> – n(%)                                |                   |
| Never                                                                                    | 46 (60)           |
| ≤30 days                                                                                 | 0                 |
| 31 to 90 days                                                                            | 4 (5)             |

SUPPLEMENTARY DATA

|                                                           |           |
|-----------------------------------------------------------|-----------|
| 91 to 180 days                                            | 0         |
| 181 to 365 days                                           | 2 (3)     |
| >365 days                                                 | 25 (32)   |
| HbA1c <sup>b</sup> – n(%)                                 |           |
| ≤7%                                                       | 21 (27)   |
| 7.1 to 8.0%                                               | 22 (29)   |
| 8.1 to 9.0%                                               | 15 (19)   |
| 9.1 to 10.0%                                              | 8 (10)    |
| >10.0%                                                    | 11 (14)   |
| Mean ±SD                                                  | 8.3 ± 1.8 |
| Clarke Hypoglycemia Unawareness score <sup>c</sup> – n(%) |           |
| Reduced awareness                                         | 10 (13)   |
| Intermediate                                              | 10 (13)   |
| Aware                                                     | 57 (74)   |

<sup>a</sup>Severe hypoglycemic event defined as an episode that required third party assistance for treatment

<sup>b</sup>HbA1c performed locally by point of care device or laboratory

<sup>c</sup>Reduced awareness = 4 or more reduced responses; Intermediate = 3 reduced responses; Aware= 2 or fewer reduced responses

SUPPLEMENTARY DATA

**Supplementary Table S2. Additional Insulin Infusion Characteristics by Treatment Arm**

|                                                         | Intranasal<br>N=75 | Intramuscular<br>N=75 |
|---------------------------------------------------------|--------------------|-----------------------|
| Initial rate of insulin infusion – n(%)                 |                    |                       |
| 1.0 mU/kg/min                                           | 2 (3)              | 1 (1)                 |
| 1.5 mU/kg/min                                           | 4 (5)              | 7 (9)                 |
| 2.0 mU/kg/min                                           | 69 (92)            | 67 (89)               |
| Final rate of insulin infusion (mU/kg/min)              |                    |                       |
| Median (25 <sup>th</sup> , 75 <sup>th</sup> percentile) | 1.0 (1.0, 1.0)     | 1.0 (1.0, 1.0)        |
| Average rate of insulin infusion<br>(mU/kg/min)         |                    |                       |
| Median (25 <sup>th</sup> , 75 <sup>th</sup> percentile) | 1.7 (1.5, 1.8)     | 1.7 (1.5, 1.8)        |

SUPPLEMENTARY DATA

**Supplementary Figure S1. Intranasal glucagon device**

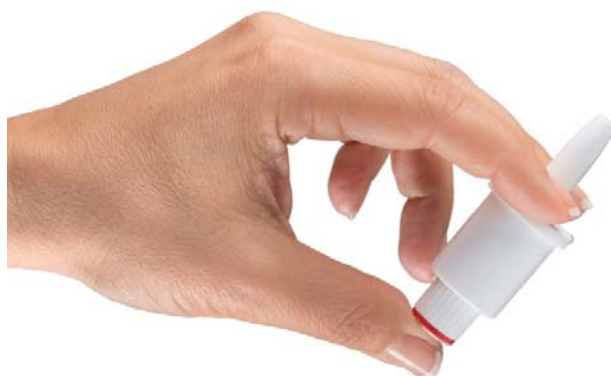

SUPPLEMENTARY DATA

**Supplementary Figure S2. Visit Completion**

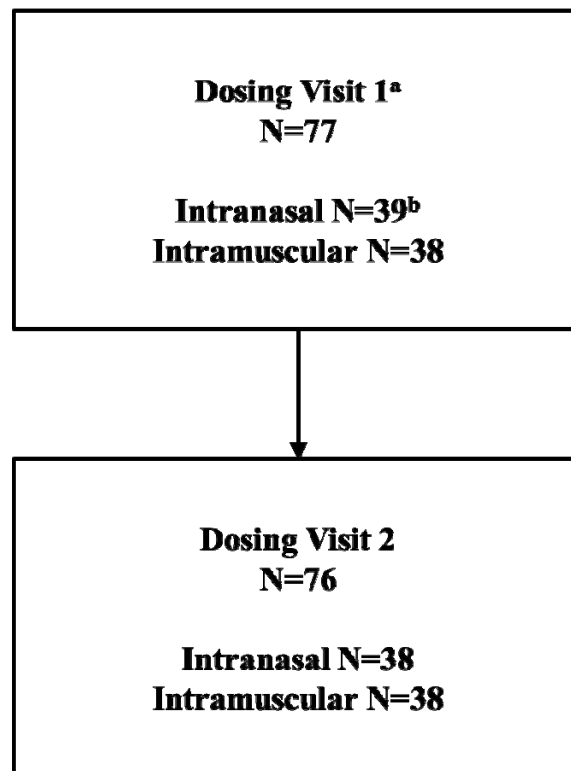

<sup>a</sup> 1 ineligible first dosing visit (premature administration of carbohydrates); information from this participant was not used in the efficacy analysis

<sup>b</sup> 1 participant requested to withdrawal after completing the first dosing visit due to symptoms experienced during the dosing visit (nausea, vomiting, high blood glucose)

N=77 completed at least 1 visit – included in safety analysis

N=75 completed both visits – included in the efficacy analysis

SUPPLEMENTARY DATA

**Supplementary Figure S3. Edinburgh Hypoglycemia Symptom Scores According to Treatment Visit**

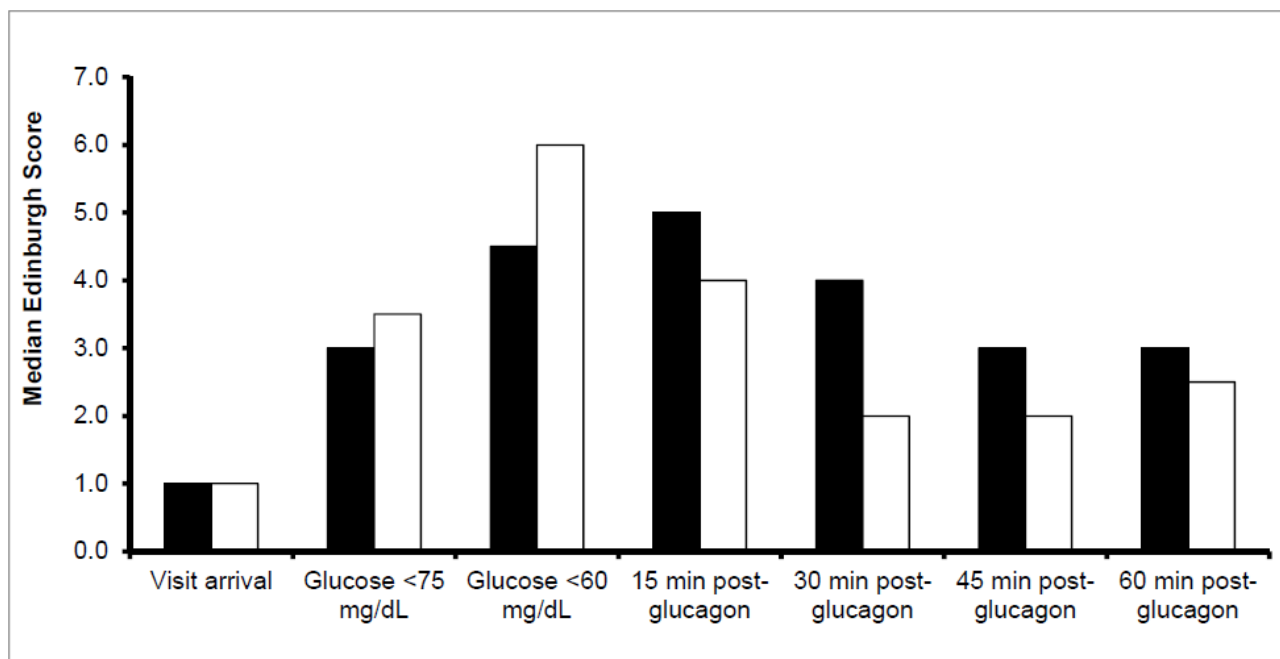

Figure Legend

Black columns represent the Intranasal group

White columns represent the Intramuscular group

## SUPPLEMENTARY DATA

### List of Investigators

A listing of the T1D Exchange Clinic Network sites with participating principal investigators (PI), co-investigators (I), and coordinators (C) ordered by the number of participants recruited per site is included below:

**University of Buffalo School of Medicine and Biomedical Sciences, The State University of New York, Buffalo, NY** (n=14) Kathleen E. Bethin (PI); Lucy Mastrandrea (I); Michelle Ecker (C); Jessica Sickau (C); **Indiana University School of Medicine, Indianapolis, IN** (n=12) Linda A. DiMeglio (PI); Carmelle Evans-Molina (I); Stephanie Woerner (C); Jill Meier (C); Jennifer Terrell (C); Vanessa Patrick (C); **University of Pennsylvania Perelman School of Medicine, Philadelphia, PA** (n=12) Michael R. Rickels (PI); Anastasia Amaro (I); Patricia Bourne (C); Amy Pelekis (C); **Yale School of Medicine, New Haven, CT** (n=12) Jennifer Sherr (PI); William Tamborlane (I); Amy Steffen (C); Melinda Zgorski (C); Kate Weyman (C); Eileen Tichy (C); Neha Patel (C); **Barbara Davis Center for Childhood Diabetes, Aurora, CO** (n=11) R. Paul Wadwa (PI); Georgenna J. Klingensmith (I); David M. Maahs (I); Katherine Manseau (C); Nhung Nguyen (C); Laurel Messer (C); Sally Sullivan (C); **Oregon Health and Science University Harold Schnitzer Diabetes Health Center, Portland, OR** (n=10) Andrew J. Ahmann (PI); Bethany Klopfenstein (I); Bethany Wollam (C); Bradley White (C); Christopher Bogan (C); Rebecca Fitch (C); Jennifer Cox (C); **University of Florida, Gainesville, FL** (n=5) Desmond A. Schatz (PI); Michael J. Haller (I); Miriam Cintron (C); Jamie Thomas (C); **University of Minnesota, Minneapolis, MN** (n=4) Brandon M. Nathan (PI); Janice Leschyshyn (C)
